# Supplementary material for: Azithromycin to Reduce Childhood Mortality in Sub-Saharan Africa
Source: Atypon-hosted journal article supplement (doi:10.1056/nejmoa1715474), 2018-04-25
Supplement: nejmoa1715474_appendix.pdf [file nejmoa1715474_appendix.pdf]

## Supplementary Appendix

This appendix has been provided by the authors to give readers additional information about their work.

Supplement to: Keenan JD, Bailey RL, West SK, et al. Azithromycin to reduce childhood mortality in sub-Saharan Africa. *N Engl J Med* 2018;378:1583-92. DOI: [10.1056/NEJMoa1715474](https://doi.org/10.1056/NEJMoa1715474)

## APPENDIX

### Table of Contents

|                                                                                     |   |
|-------------------------------------------------------------------------------------|---|
| Research Team.....                                                                  | 2 |
| Acknowledgements.....                                                               | 2 |
| Table S1: Aggregate treatment coverage by arm and period.....                       | 3 |
| Table S2: Treatment coverage by country, arm, and period.....                       | 3 |
| Table S3. Census results.....                                                       | 4 |
| Table S4: Verbal Autopsy.....                                                       | 4 |
| Table S5. Deaths and person-time-at-risk by age group.....                          | 5 |
| Table S6. Reduction of mortality with oral azithromycin by age group.....           | 5 |
| Table S7. Deaths and person-time-at-risk by inter-census period.....                | 6 |
| Table S8. Reduction of mortality with oral azithromycin by inter-census period..... | 6 |
| Table S9. Serious adverse events.....                                               | 7 |

## Research Team

In addition to the authors, the following investigators participated in MORDOR: *University of California, San Francisco, San Francisco, CA, USA* – Thuy Doan, Catherine E Oldenburg, Sun Y Cotter, Nicole E Stoller, Benjamin Vanderschelden, Dionna M Fry, Philip J Rosenthal, George W Rutherford, Zhaoxia Zhou, Lina Zhong, Bruce D Gaynor, John P Witcher; *London School of Hygiene and Tropical Medicine, London, UK* – David CW Mabey, Sarah E Burr, Anthony W Solomon; *Johns Hopkins University, Baltimore, MD, USA* – Kurt Dreger, Beatriz Munoz, Christian L Coles, Alain B Labrique, Alfred Sommer, Hemjot Kaur, Evan M Bloch; *Blantyre Institute for Community Ophthalmology, Blantyre, Malawi* – Alvin Chisambi, Zachariah Kamwendo; *University of Malawi College of Medicine, Blantyre, Malawi* – Ken Maleta; *The Carter Center, Atlanta, GA, USA* – E Kelly Callahan, Aisha E Stewart; *The Carter Center Niger, Niamey, Niger* – Salissou Kane; *Programme National de Santé Oculaire, Niamey, Niger* – Amza Abdou, Boubacar Kadri, Nassirou Beido; *Muhimbili University of Health and Allied Sciences, Dar es Salaam, Tanzania* – Mabula Kasubi; *National Institute for Medical Research, Dar es Salaam, Tanzania* – Leonard Mboera.

The steering committee for the trial consisted of the following investigators: Robin L Bailey, Jeremy D Keenan, Thomas M Lietman (PI), Travis C Porco, and Sheila K West.

## Acknowledgements

We thank the program officers from the trial's sponsor: *Bill & Melinda Gates Foundation, Seattle, WA, USA* – Rasa Izadnegahdar, Julie Jacobson, Thomas Kanyok, Erin Shutes. We also thank the members of the Data and Safety Monitoring Committee: *University of Washington, Seattle, WA, USA* – Judd L Walson; *Liverpool School of Tropical Medicine, Liverpool, UK* – Allen W Hightower; *Loyola University, Chicago, IL, USA* – Emily E Anderson, *Berhan Public Health & Eye Care Consultancy, Addis Ababa, Ethiopia* – Wondu Alemayehu; *Tulane University, New Orleans, LA, USA* – Latha Rajan.

**Table S1: Aggregate treatment coverage by arm and period for all three countries**

| Inter-census period | Mean ( $\pm$ SD)     |                      |
|---------------------|----------------------|----------------------|
|                     | Azithromycin         | Placebo              |
| 1                   | 92.7% ( $\pm$ 10.9%) | 92.8% ( $\pm$ 10.6%) |
| 2                   | 86.5% ( $\pm$ 11.3%) | 86.7% ( $\pm$ 10.8%) |
| 3                   | 90.1% ( $\pm$ 11.2%) | 90.5% ( $\pm$ 10.5%) |
| 4                   | 91.7% ( $\pm$ 7.7%)  | 91.8% ( $\pm$ 7.1%)  |
| All                 | 90.3% ( $\pm$ 10.6%) | 90.4% ( $\pm$ 10.1%) |

*Coverage over all countries, all phases, and both arms was 90.4% ( $\pm$ 10.4%).*

**Table S2: Treatment coverage by country, arm, and period**

| Inter-census period | Malawi<br>Mean ( $\pm$ SD) |                     | Niger<br>Mean ( $\pm$ SD) |                     | Tanzania<br>Mean ( $\pm$ SD) |                      |
|---------------------|----------------------------|---------------------|---------------------------|---------------------|------------------------------|----------------------|
|                     | Azithromycin               | Placebo             | Azithromycin              | Placebo             | Azithromycin                 | Placebo              |
| 1                   | 88.0% ( $\pm$ 6.5%)        | 88.5% ( $\pm$ 6.8%) | 98.0% ( $\pm$ 5.3%)       | 97.5% ( $\pm$ 7.8%) | 89.9% ( $\pm$ 14.1%)         | 90.5% ( $\pm$ 12.7%) |
| 2                   | 89.9% ( $\pm$ 6.2%)        | 89.9% ( $\pm$ 7.0%) | 91.5% ( $\pm$ 6.4%)       | 91.8% ( $\pm$ 6.2%) | 80.0% ( $\pm$ 13.7%)         | 80.2% ( $\pm$ 12.3%) |
| 3                   | 93.6% ( $\pm$ 4.7%)        | 93.8% ( $\pm$ 4.3%) | 95.8% ( $\pm$ 4.9%)       | 96.2% ( $\pm$ 4.5%) | 82.8% ( $\pm$ 13.6%)         | 83.4% ( $\pm$ 12.3%) |
| 4                   | 94.6% ( $\pm$ 4.5%)        | 94.0% ( $\pm$ 5.4%) | 92.9% ( $\pm$ 5.2%)       | 92.4% ( $\pm$ 6.2%) | 89.2% ( $\pm$ 10.0%)         | 90.1% ( $\pm$ 8.2%)  |
| All                 | 91.5% ( $\pm$ 6.1%)        | 91.5% ( $\pm$ 6.4%) | 94.5% ( $\pm$ 6.0%)       | 94.5% ( $\pm$ 6.7%) | 85.5% ( $\pm$ 13.6%)         | 86.1% ( $\pm$ 12.3%) |

**Table S3. Census results**

| Category           | All Countries |               | Malawi        |               | Niger         |               | Tanzania     |              |
|--------------------|---------------|---------------|---------------|---------------|---------------|---------------|--------------|--------------|
|                    | Azithromycin  | Placebo       | Azithromycin  | Placebo       | Azithromycin  | Placebo       | Azithromycin | Placebo      |
| Census enrollments | <b>371592</b> | <b>358815</b> | <b>139150</b> | <b>141300</b> | <b>161257</b> | <b>143280</b> | <b>71185</b> | <b>74235</b> |
| Died               | 2404          | 2616          | 502           | 542           | 1727          | 1888          | 175          | 186          |
| Moved              | 24415         | 23123         | 8351          | 7710          | 10084         | 8760          | 5980         | 6653         |
| Unknown            | 18809         | 17587         | 11845         | 12160         | 6087          | 4508          | 877          | 919          |
| Alive              | 325964        | 315489        | 118452        | 120888        | 143359        | 128124        | 64153        | 66477        |

**S4: Verbal Autopsy**

| Cause                        | Malawi | Niger | Tanzania |
|------------------------------|--------|-------|----------|
| Diarrhea/Possible Diarrhea   | 6/39   | 1/48  | 12/16    |
| Dysentery/Possible Dysentery | 1/1    | 1/2   | 4/2      |
| Injury                       | 7      | 5     | 13       |
| Malaria/ Possible Malaria    | 48/55  | 84/38 | 65/19    |
| Malnutrition                 | 9      | 3     | 24       |
| Measles                      | 0      | 1     | 1        |
| Meningitis                   | 11     | 11    | 8        |
| Other Infection              | 9      | 10    | 1        |
| Pneumonia/Possible Pneumonia | 8/18   | 8/8   | 27/20    |
| Unspecified                  | 38     | 30    | 38       |

*Random sample of 250 deaths per country*

*P<0.001 (permutation p-value clustered by community)*

**Table S5. Deaths and person-time-at-risk by age group.** (Totals can be affected by rounding.)

| Age (mos) | Malawi                                |             | Niger                                 |             | Tanzania                              |            |
|-----------|---------------------------------------|-------------|---------------------------------------|-------------|---------------------------------------|------------|
|           | Deaths / Person-years<br>Azithromycin | Placebo     | Deaths / Person-years<br>Azithromycin | Placebo     | Deaths / Person-years<br>Azithromycin | Placebo    |
| 1-5       | 57 / 3617                             | 82 / 3739   | 202 / 5653                            | 244 / 5148  | 21 / 2189                             | 31 / 2229  |
| 6-11      | 102 / 5747                            | 98 / 5912   | 286 / 7901                            | 340 / 7143  | 41 / 3599                             | 39 / 3595  |
| 12-23     | 131 / 11639                           | 136 / 11897 | 491 / 15207                           | 511 / 13573 | 54 / 7562                             | 57 / 7924  |
| 24-59     | 212 / 34269                           | 226 / 34738 | 748 / 48113                           | 793 / 42860 | 59 / 19162                            | 59 / 19886 |

**Table S6 (for Figure 3, main text): Reduction of mortality with oral azithromycin by age group**

| Age (mos) | All Countries          |       | Malawi                  |      | Niger                 |       | Tanzania                |      |
|-----------|------------------------|-------|-------------------------|------|-----------------------|-------|-------------------------|------|
|           | Estimate (95%CI)       | P     | Estimate (95%CI)        | P    | Estimate (95%CI)      | P     | Estimate (95%CI)        | P    |
| 1-5       | 24.9% (10.6% to 37.0%) | 0.001 | 27.6% (-4.1% to 49.7%)  | 0.08 | 23.1% (4.9% to 37.8%) | 0.02  | 31.2% (-22.7% to 61.4%) | 0.21 |
| 6-11      | 14.2% (0.0% to 26.3%)  | 0.05  | -6.2% (-43.2% to 21.2%) | 0.69 | 23.3% (7.4% to 36.3%) | 0.01  | -1.4% (-67.1% to 38.5%) | 0.96 |
| 12-23     | 10.0% (-1.9% to 20.4%) | 0.10  | 0.7% (-29.5% to 23.9%)  | 0.96 | 14.0% (0.1% to 26.0%) | 0.048 | 0.9% (-45.0% to 32.3%)  | 0.96 |
| 24-59     | 12.6% (3.6% to 20.8%)  | 0.01  | 5.0% (-16.1% to 22.2%)  | 0.62 | 16.5% (6.1% to 25.8%) | 0.003 | -3.3% (-50.4% to 29.0%) | 0.86 |

*Mortality reduction was estimated from a negative binomial regression modeling community-specific deaths as a function of treatment arm, age group, and the treatment by age group interaction, with person-time at risk used as an offset. Positive numbers indicate a mortality reduction with azithromycin relative to placebo.*

**Table S7. Deaths and person-time-at-risk by inter-census period.** (Totals can be affected by rounding.)

| Inter-census period | Malawi                |             | Niger                 |             | Tanzania              |           |
|---------------------|-----------------------|-------------|-----------------------|-------------|-----------------------|-----------|
|                     | Deaths / Person-years |             | Deaths / Person-years |             | Deaths / Person-years |           |
|                     | Azithromycin          | Placebo     | Azithromycin          | Placebo     | Azithromycin          | Placebo   |
| 1                   | 118 / 12068           | 105 / 11998 | 531 / 23318           | 557 / 20549 | 64 / 9016             | 61 / 9311 |
| 2                   | 159 / 15861           | 159 / 15935 | 382 / 17281           | 427 / 16015 | 53 / 8773             | 57 / 8948 |
| 3                   | 97 / 12146            | 115 / 12678 | 439 / 18753           | 466 / 16744 | 38 / 7439             | 46 / 7767 |
| 4                   | 128 / 15197           | 163 / 15676 | 375 / 17521           | 438 / 15415 | 20 / 7284             | 22 / 7608 |

**Table S8 (for Figure 4, main text): Reduction of mortality with oral azithromycin by inter-census period**

| Inter-census period | All Countries          |        | Malawi                   |       | Niger                  |       | Tanzania                |      |
|---------------------|------------------------|--------|--------------------------|-------|------------------------|-------|-------------------------|------|
|                     | Estimate (95% CI)      | P      | Estimate (95% CI)        | P     | Estimate (95% CI)      | P     | Estimate (95% CI)       | P    |
| 1                   | 7.3% (-5.9% to 18.8%)  | 0.26   | -14.1% (-57.7% to 27.3%) | 0.42  | 15.0% (0.6% to 27.3%)  | 0.04  | -7.1% (-56.7% to 26.8%) | 0.72 |
| 2                   | 11.2% (-1.1% to 22.1%) | 0.07   | -0.0% (-29.5% to 22.8%)  | >0.99 | 17.0% (2.1% to 29.5%)  | 0.03  | 5.1% (-38.4% to 34.9%)  | 0.79 |
| 3                   | 15.7% (3.7% to 26.2%)  | 0.01   | 12.2% (-17.4% to 34.3%)  | 0.38  | 16.9% (2.6% to 29.2%)  | 0.02  | 13.8% (-32.8% to 44.1%) | 0.50 |
| 4                   | 22.0% (10.6% to 31.9%) | <0.001 | 19.3% (-4.1% to 37.4%)   | 0.10  | 24.1% (10.3% to 35.7%) | 0.001 | 5.1% (-74.0% to 48.2%)  | 0.87 |

Mortality reduction was estimated from a negative binomial regression modeling community-specific deaths as a function of treatment arm, inter-census period, and the treatment by inter-census period interaction, with person-time at risk used as an offset. Positive numbers indicate a mortality reduction with azithromycin relative to placebo.

**Table S9. Adverse events.** Serious adverse events (hospitalizations or deaths reported to study staff within 1 week of study drug administration) were documented according to Pfizer’s adverse event reporting system. Non-serious adverse events were managed at local health facilities with guidance from the World Health Organization Integrated Management of Childhood Illness manual. Although village informants and health facilities were encouraged to report possible adverse events, in practice very few adverse events were brought to the attention of study staff.

| Condition             | Malawi       |         | Niger        |         | Tanzania     |         |
|-----------------------|--------------|---------|--------------|---------|--------------|---------|
|                       | Azithromycin | Placebo | Azithromycin | Placebo | Azithromycin | Placebo |
| Malaria               | 0            | 0       | 0            | 0       | 4            | 3       |
| Respiratory infection | 0            | 0       | 0            | 0       | 1            | 2       |
| Diarrhea              | 0            | 0       | 0            | 1       | 0            | 0       |
| Ileus                 | 0            | 0       | 0            | 0       | 1            | 0       |
| Dehydration           | 0            | 0       | 0            | 0       | 0            | 2       |
| Coma                  | 0            | 0       | 1            | 0       | 0            | 0       |
| Death                 | 0            | 1       | 1            | 0       | 3            | 0       |
